# Supplementary material
Source: Springer Nature journal article supplement (https://www.springermedizin.de/resource/supplementary/12905_2014_454_MOESM2_ESM.pdf/9518852)

# Flow Diagram: Simplified Medical Abortion RCT

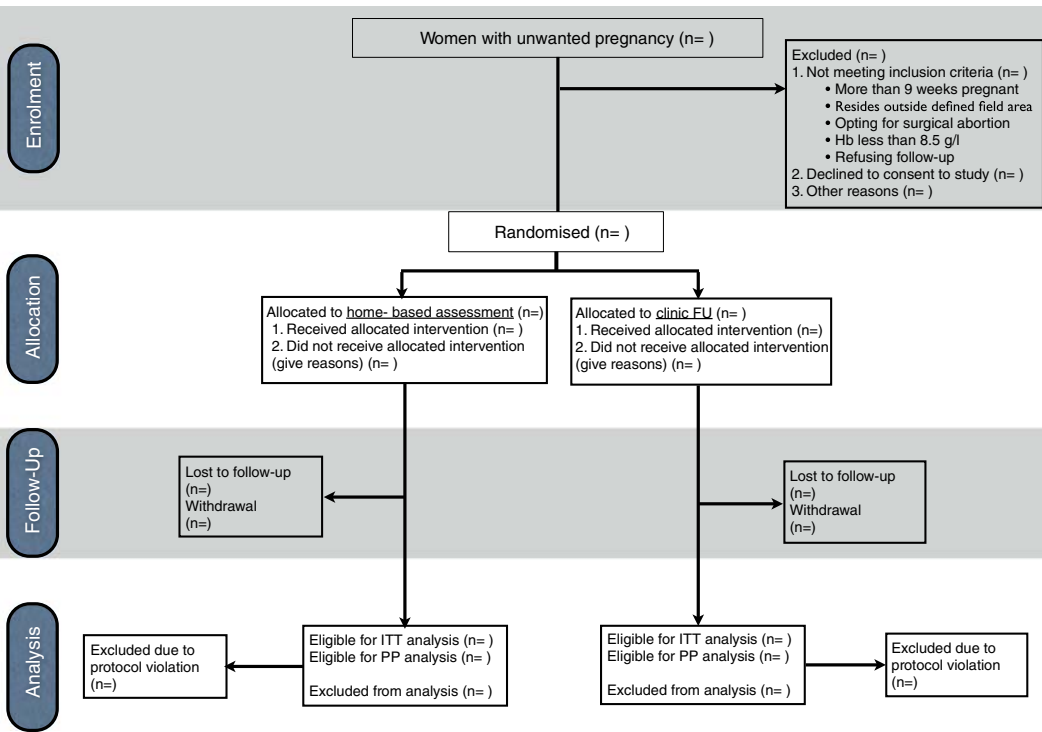

Supplement: MOESM2 [file 9518852]
